# Supplementary material for: INTEGRATE: Model-based multi-omics data integration to characterize multi-level metabolic regulation
Source: PubMed Central journal article supplement (PMC8853556; doi:10.1371/journal.pcbi.1009337), 2022-02-07

*Transcriptional control*

*Metabolic control*

*Combined control*

Condition a = reference condition

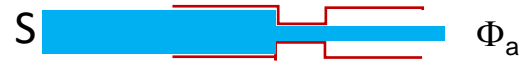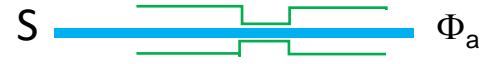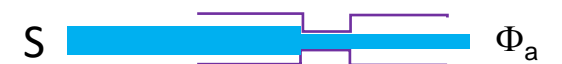

Condition b = increase enzyme E

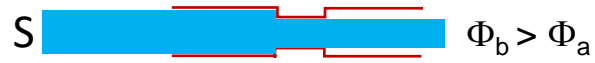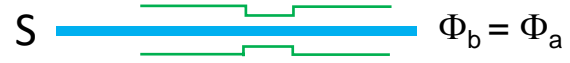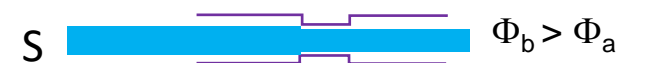

Condition c = increase substrate S

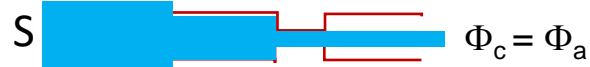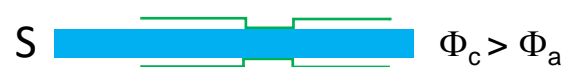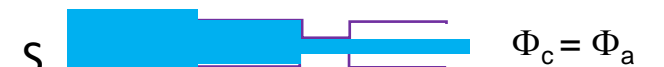

Condition d = increase S and E

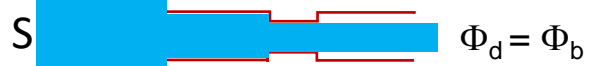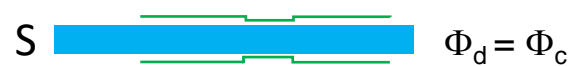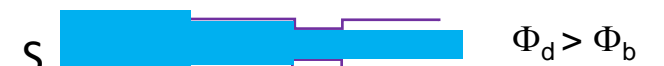

Supplement: pcbi.1009337.s001.pdf [file pcbi.1009337.s001.pdf]
